# Supplementary material
Source: PubMed Central journal article supplement (PMC6003523)
Supplement: pnas.1800541115.sapp.pdf [file pnas.1800541115.sapp.pdf]

# **IonStar enables high-precision, low-missing-data proteomics quantification in large sample cohorts**

#Xiaomeng Shen<sup>1,2</sup>, #Shichen Shen<sup>1,2</sup>, Jun Li<sup>1,2</sup>, Qiang Hu<sup>3</sup>, Lei Nie<sup>4</sup>, Chengjian Tu<sup>1,2</sup>, Xue Wang<sup>2,3</sup>, David J. Poulsen<sup>5</sup>, Benjamin C. Orsburn<sup>6\*</sup>, Jianmin Wang<sup>3\*</sup>, Jun Qu<sup>1,2\*</sup>

*<sup>1</sup>Department of Pharmaceutical Sciences, SUNY at Buffalo, Buffalo, NY; <sup>2</sup>Center of Excellence in Bioinformatics & Life Science, Buffalo, NY; <sup>3</sup>Roswell Park Cancer Institute, Buffalo, NY; <sup>4</sup>Shandong University, China; <sup>5</sup>Department of neurosurgery, Jacobs School of Medicine and Biomedical Sciences, SUNY at Buffalo, Buffalo, NY; <sup>6</sup>Cancer Research Technology Program, Frederick National Laboratory for Cancer Research, Frederick, MD*

## **SI APPENDIX**

**Fig. S1** Depiction of feature generation and peptide ID propagation strategies.

**Fig. S2** Examples of extracted ion currents.

**Fig. S3** Effects of feature quality control measure on quantitative quality.

**Fig. S4** Application of GLMM in spike-in sample sets.

**Fig. S5** Design of the benchmark spike-in sample set.

**Fig. S6** Effects of peptide number per protein on quantification.

**Fig. S7** Quantitative results of human proteins in the benchmark dataset.

**Fig. S8** Examples of outlier detection and removal.

**Fig. S9** FADR calculation using different ratio thresholds.



**Fig. S10** Median intra-group CV of quantified proteins in biological groups.

**Fig. S11** Pearson correlation of protein ratios in the two brain regions.

**Fig. S12** Ingenuity Pathway Analysis results of the TBI proteomics dataset.

**File S1** Detailed parameters used for each software.

**File S2** User manual for IonStar build 0.1.4.



## SUPPLEMENTARY FIGURES

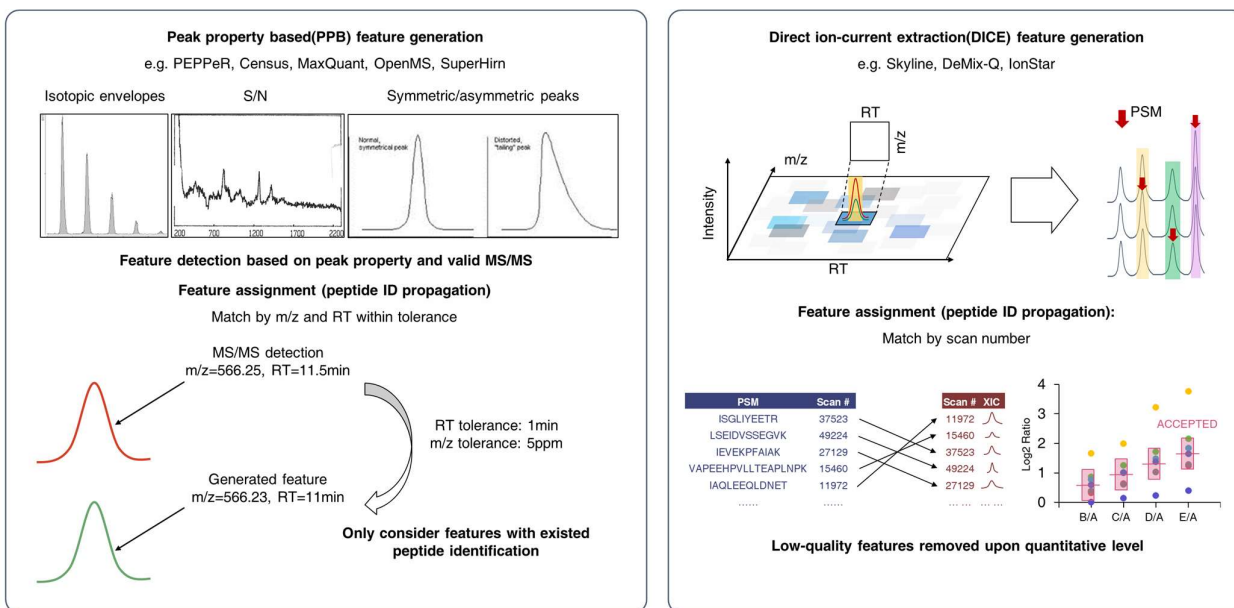

**Fig. S1** Depiction of feature generation and peptide identity propagation strategies. “PPB (peak property based) + match by m/z and RT with tolerance”<sup>1</sup> and “DICE (Direct Ion-Current Extraction) + match by scan number” that can be used in MS1-based quantification.



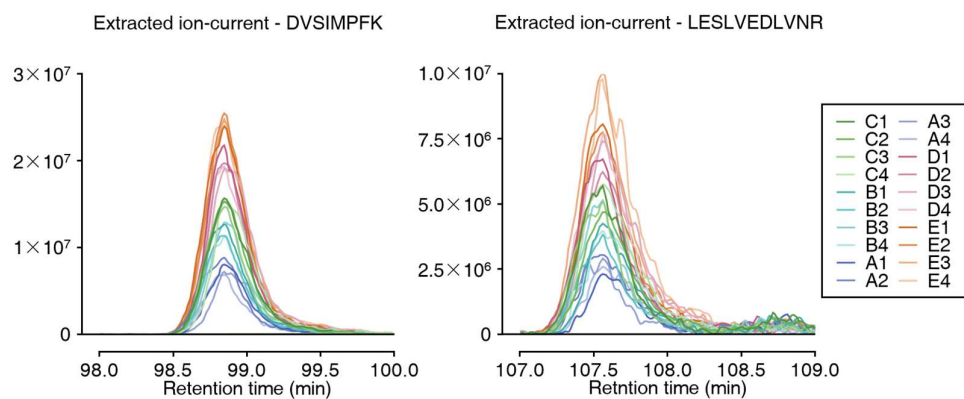

**Fig. S2** Examples of extracted ion currents of two *E. Coli* peptides by IonStar, taken from the benchmark dataset.



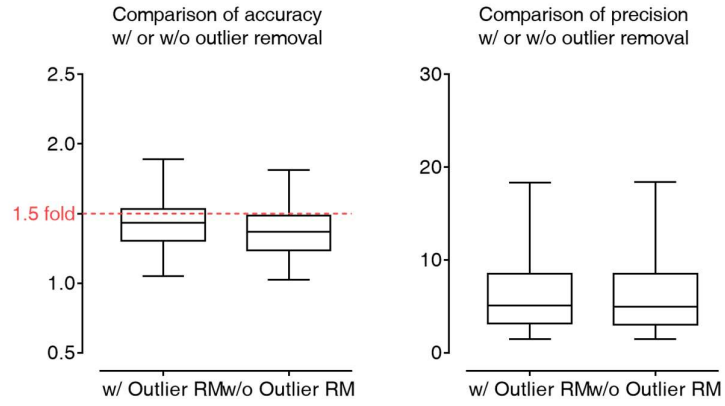

**Fig. S3** Effects of post-feature generation quality control measure on quantitative quality. *PCOut<sup>2</sup>* significantly improved accuracy while showed no perceivable impacts on precision.



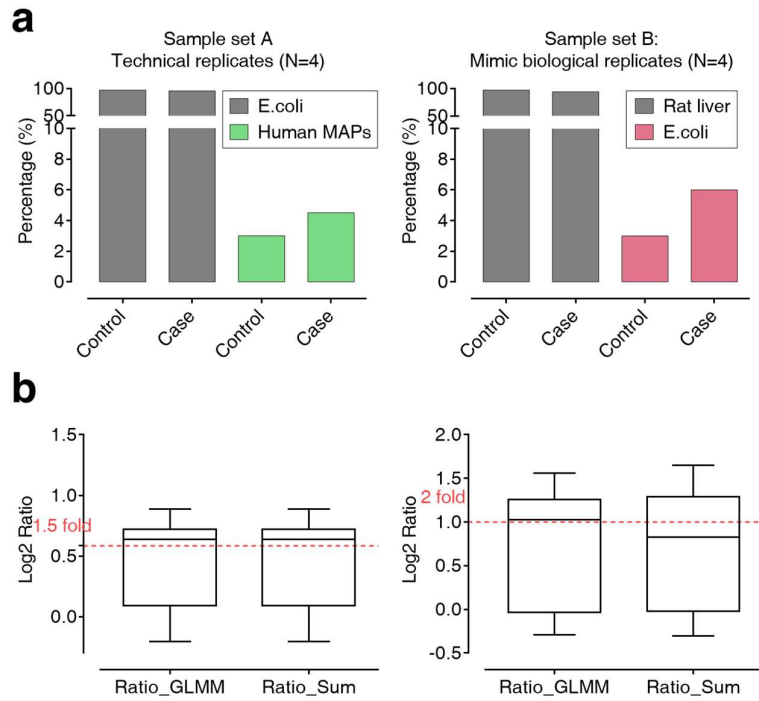

**Fig. S4** Application of Generalized Linear Mixed Model (GLMM) in spike-in sample sets. **(a)** Experimental setup of two types of spike-in samples sets: Technical replicates and Mimic biological replicates; **(b)** Comparison of quantitative accuracy in the two types of sample sets using GLMM and sum intensities. GLMM gave better accuracy in Mimic biological replicate sample set.



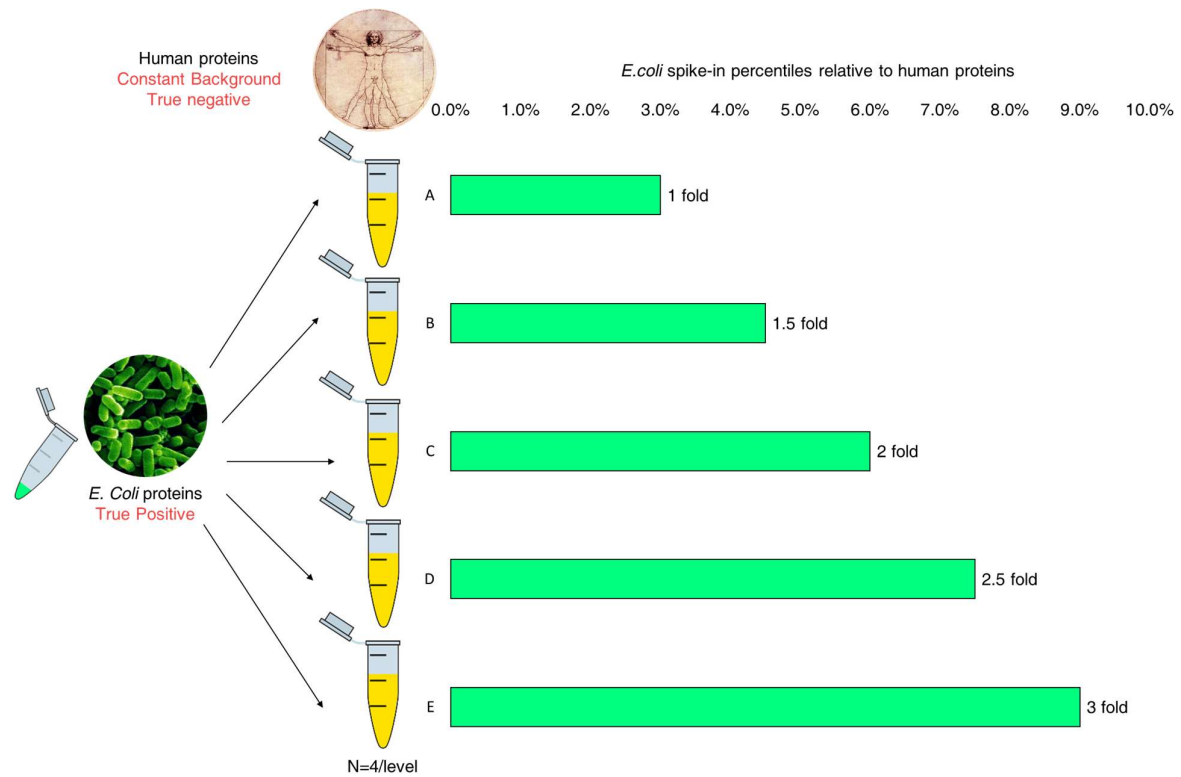

**Fig. S5** Design of the spike-in sample set for benchmarking different quantitative approaches<sup>3</sup>. *E. Coli* protein lysate (true positive) was spiked at low and variable levels into high and constant backgrounds of human cell lysate (true negative). Each of the five spike-in levels has 4 technical replicates (N=20 in total).



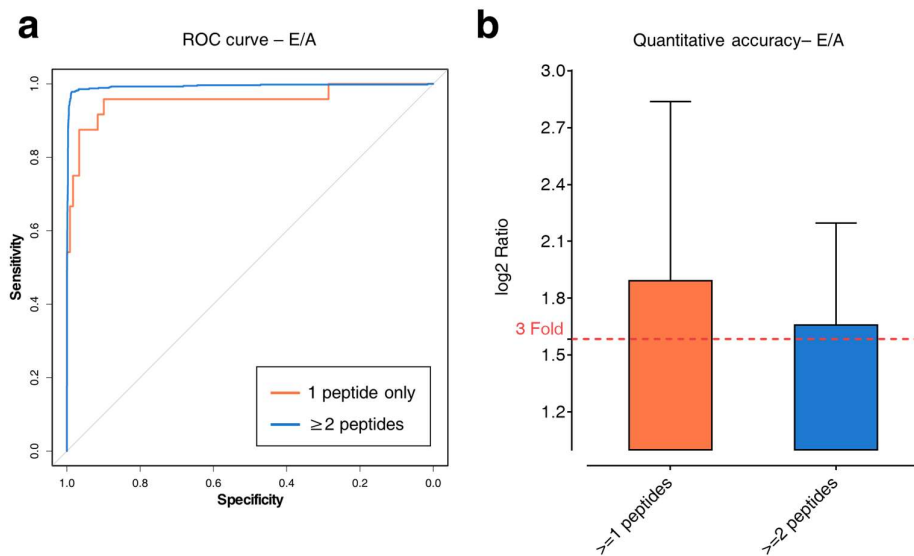

**Fig. S6** Comparison of protein quantification results with at least 1 or 2 unique peptide(s) per protein, using spike-in level E (9% E. Coli proteins) vs. A (3% E. Coli proteins) as an example. **(a)** ROC plot comparing quantification of proteins with only 1 peptide and  $\geq 2$  peptides; **(b)** Quantitative accuracy of proteins under 1-peptide and 2-peptide criterion.



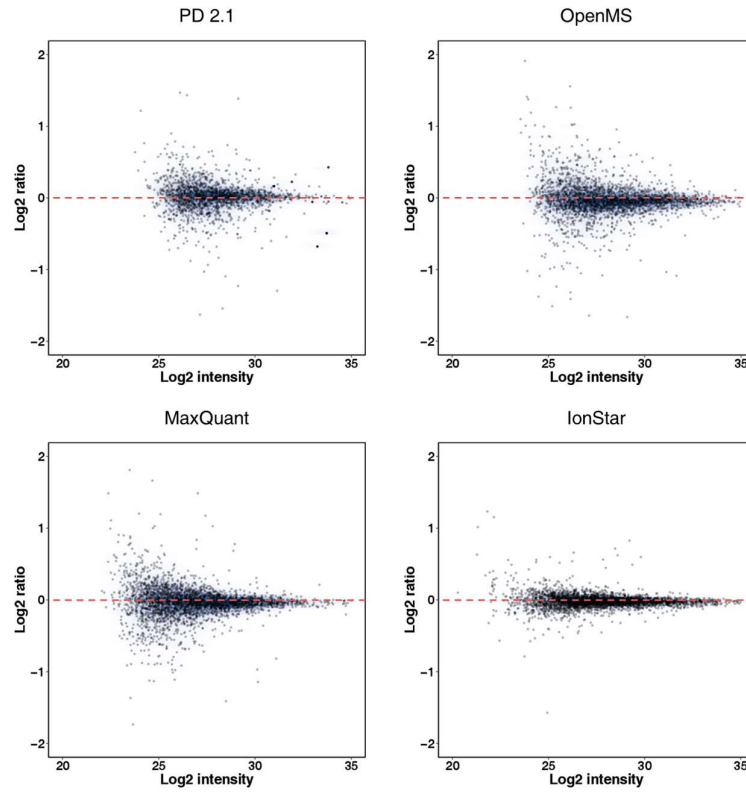

**Fig. S7** Quantitative results of human proteins (true negative) in the benchmark dataset from the four MS1-based quantitative approaches, quantitative intensities and ratios are shown in log2 scale. IonStar showed the least deviated distribution, especially for low-abundance proteins.



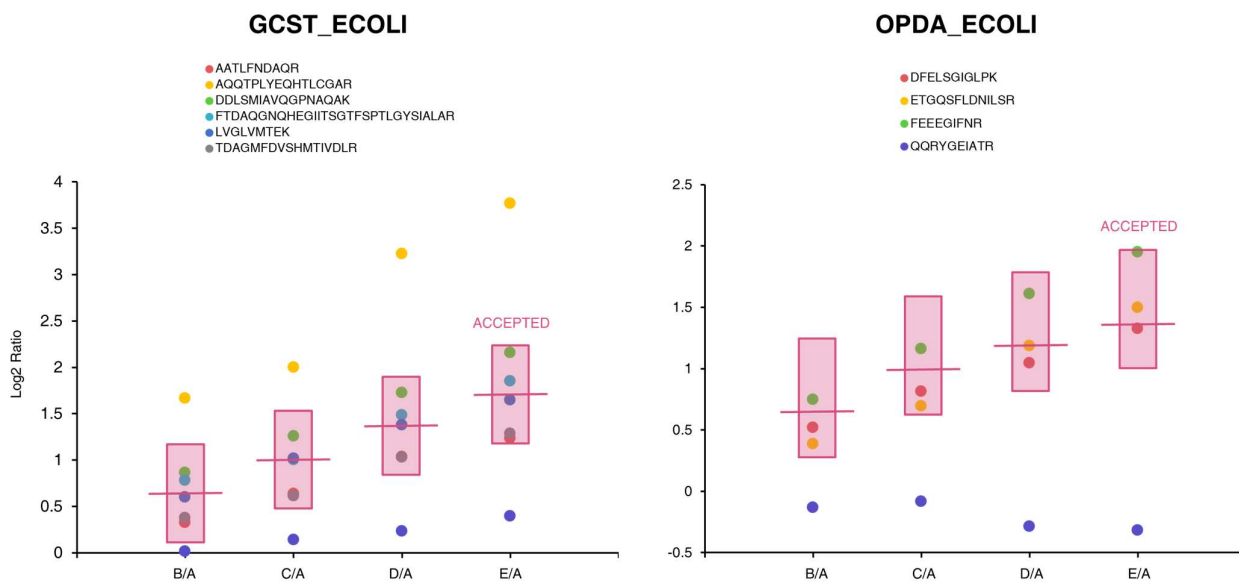

**Fig. S8** Examples to demonstrate the elimination of low-quality peptides by the post-feature generation quality control function. Red lines mark the theoretical true ratio, and shaded rectangles mark the zone in which peptide quantitative data is deemed as “acceptable” by the OutlierPeptideRM function.



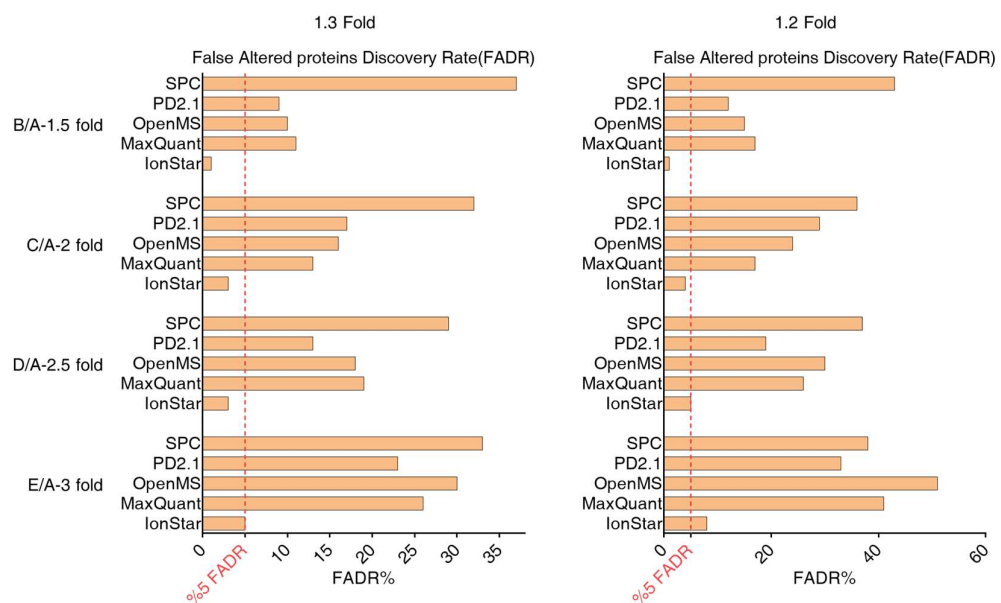

**Fig. S9** False Altered-protein Discovery Rate (FADR) calculation using different ratio thresholds.



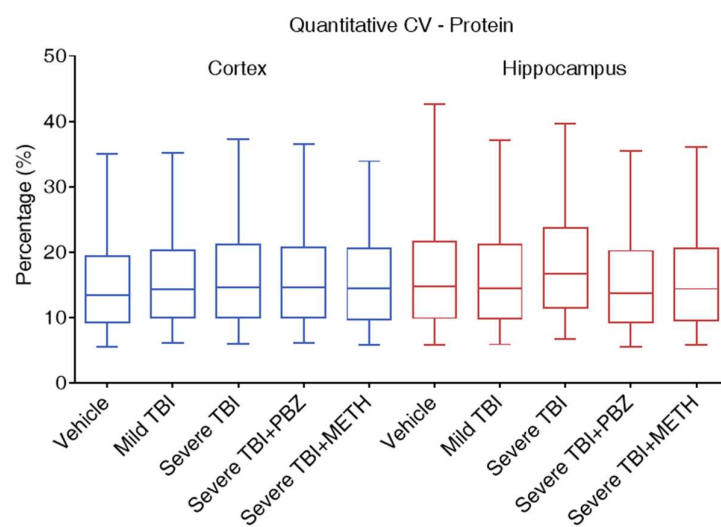

**Fig. S10** Median intra-group CV of quantified proteins in biological groups from the 100 rat brain samples.



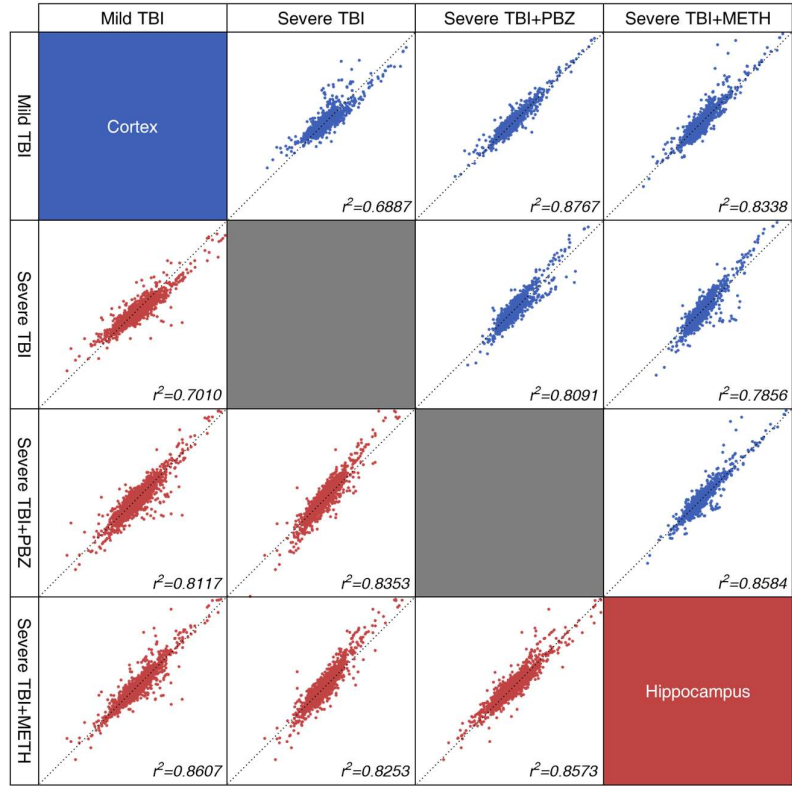

**Fig. S11** Pearson correlation of protein ratios between different experimental groups and vehicle control in the two brain regions. Blue and red colors refer to cortex and hippocampus correspondingly.



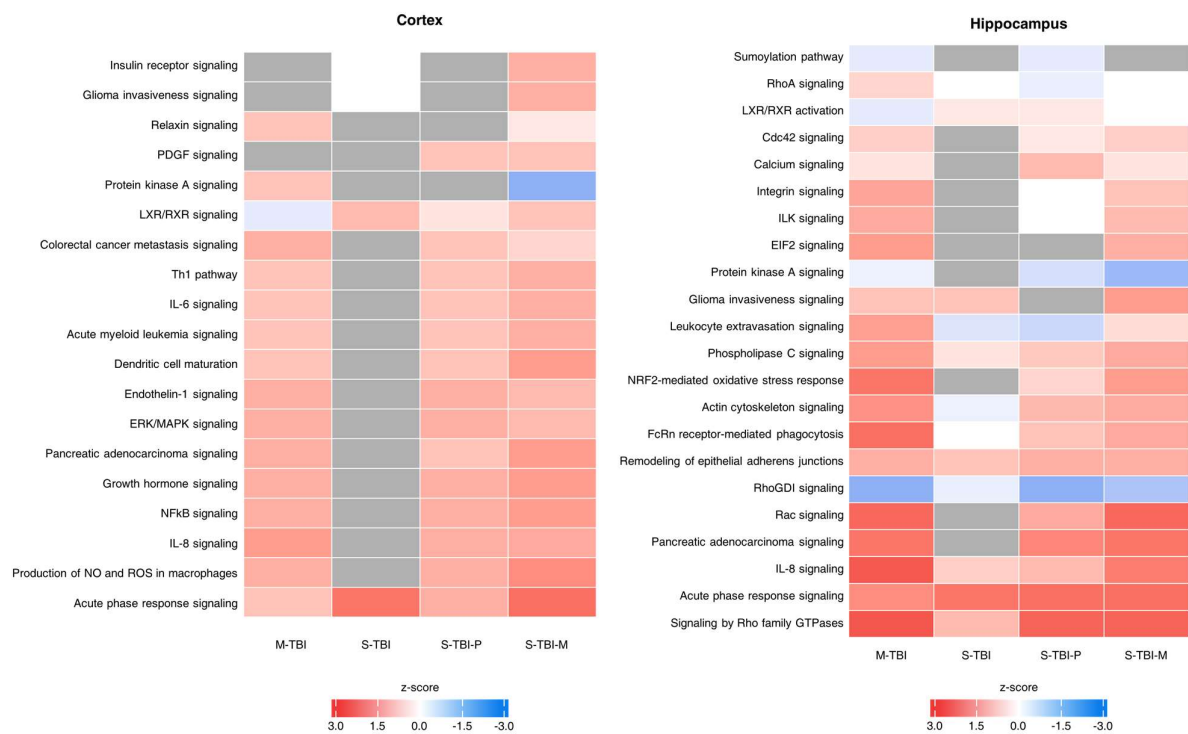

**Fig. S12** Ingenuity Pathway Analysis<sup>4</sup> results of the TBI proteomics dataset (left: cortex; right: hippocampus).



## **File S1** Parameters used in MaxQuant and OpenMS

### **MaxQuant:**

Fixed modifications Carbamidomethyl (C)

Decoy mode revert

Special AAs KR

Include contaminants False

MS/MS tol. (FTMS) 20 ppm

PSM FDR 0.005

Protein FDR 0.01

Site FDR 0.01

Use Normalized Ratios For Occupancy True

Min. peptide Length 6

Min. score for unmodified peptides 0

Min. score for modified peptides 0

Min. delta score for unmodified peptides 0

Min. delta score for modified peptides 0

Min. unique peptides 1

Min. razor peptides 2

Min. peptides 2

Use only unmodified peptides and False

Peptides used for protein quantification Razor

Discard unmodified counterpart peptides True

Min. ratio count 2

Re-quantify True



Match between runs True

Matching time window [min] 1

Alignment time window [min]20

Find dependent peptides False

Site tables Oxidation (M)Sites.txt

Decoy mode revert

Special AAs KR

Include contaminants False

RT shift False

Advanced ratios True

#### OpenMS:

| Module               | Parameter                               | Value |
|----------------------|-----------------------------------------|-------|
| <b>PeakPicker</b>    | algorithm:signal_to_noise               | 0     |
|                      | algorithm:ms1_only                      | TRUE  |
| <b>FeatureFinder</b> | algorithm:mass_trace:mz_tolerance       | 0.02  |
|                      | algorithm:mass_trace:min_spectra        | 3     |
|                      | algorithm:mass_trace:slope_bound        | 1     |
|                      | algorithm:isotopic_pattern:charge_low   | 2     |
|                      | algorithm:isotopic_pattern:charge_high  | 6     |
|                      | algorithm:isotopic_pattern:mz_tolerance | 0.03  |
|                      | algorithm:seed:min_score                | 0.1   |
|                      | algorithm:feature:min_score             | 0.3   |
|                      | algorithm:feature:min_isotope_fit       | 0.1   |



|                      |                                      |         |
|----------------------|--------------------------------------|---------|
|                      | algorithm:feature:min_trace_score    | 0.1     |
|                      | algorithm:feature:max_rt_span        | 3       |
| <b>IDMapper</b>      | rt_tolerance                         | 10      |
|                      | mz_tolerance                         | 30      |
|                      | mz_reference                         | peptide |
|                      | use_centroid_mz                      | TRUE    |
| <b>MapAligner</b>    | algorithm:min_run_occur              | 2       |
|                      | algorithm:max_rt_shift               | 300     |
| <b>FeatureLinker</b> | algorithm:use_identifications        | TRUE    |
|                      | algorithm:distance_RT:max_difference | 300     |
|                      | algorithm:distance_MZ:max_difference | 0.02    |



**File S2** User manual for IonStar build 0.1.4



# IonStar USER MANUAL

For Build 0.1.4

- Introduction
- Prerequisites
  - Software and dataset availability
  - Installing IonStarStat
  - File location
- Quickstart
  - Step 1: Protein identification
  - Step 2: Generation of quantitative features by SIEVE™
  - Step 3: Data integration and quantification
  - Step 4: Post-quantification data processing
- Contact information

## Introduction

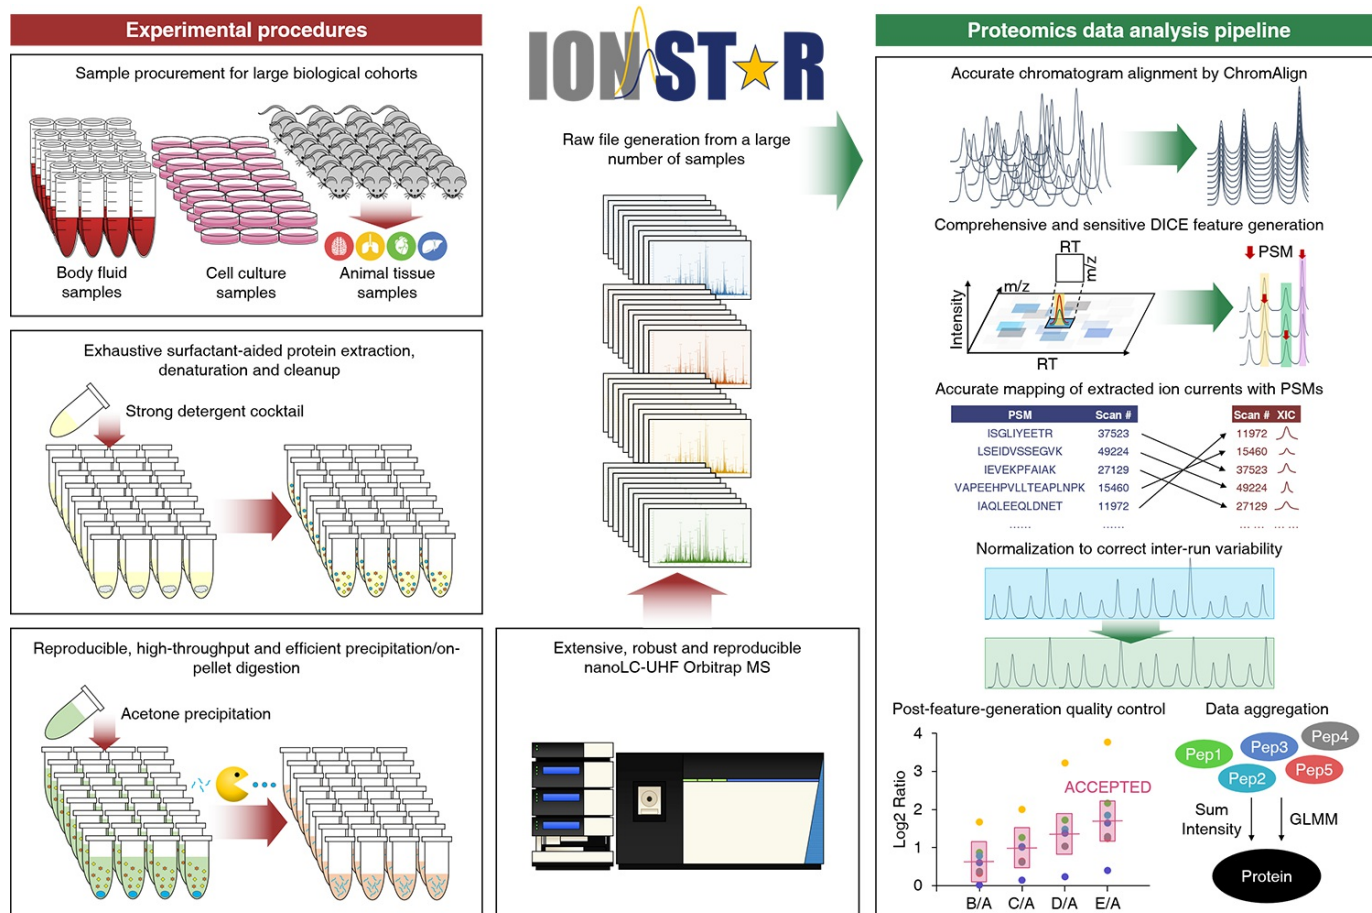

IonStar is an MS1-based quantitative method for label-free proteomics experiments, devised to address issues related with quantitative precision, missing data, and false-positive discovery of protein changes in large-cohort analysis.

IonStar comprises of two parts: experimental procedures (left panel) and a proteomics data analysis pipeline (right panel). Details of the experimental procedures can be found in [Shen et al. \*J Proteome Res.\* \(2017\)](#) and [An et al. \*Anal Chem.\* \(2015\)](#).

This manual will focus on the data analysis pipeline part of IonStar, aiming at helping IonStar users



to run the pipeline in their own computational environment.

---

## Prerequisites

### Software and dataset availability

The primary software packages used in IonStar are **SIEVE™** and **IonStarStat**.

**SIEVE™** is a commercial software from Thermo Fisher Scientific. The latest version of SIEVE™ is v2.2 SP2. Please contact Thermo Fisher Scientific regarding the quote for SIEVE™. To ensure of proper performance of SIEVE™, we recommend running SIEVE™ on a PC with at least 16-core processors and at least 192 GB RAM.

R package **IonStarStat** and related scripts (**IonStar\_FrameGen.R**, **IonStar\_Run.R**) can be downloaded [here](#). All operations in this manual are accomplished under R version 3.4.3 and RStudio ver 1.1.442.

The dataset used in this manual as an example (Multi-level Human background+E.coli spike-in) can be downloaded from [PRIDE Archive](#) (PRIDE ID: PXD003881).

### Installing IonStarStat

IonStarStat package can be installed directly in RStudio by running the following commands in the R Console:

```
#Install dependencies "RSQLite""MCMCglmm""affyPLM""mvoutlier"
source("https://bioconductor.org/biocLite.R")
biocLite("affyPLM")
biocLite("MCMCglmm")
biocLite("RSQLite")
install.packages("mvoutlier")
install.packages("IonStarStat_0.1.4.tar.gz", repos = NULL, type = "source")
```

Upon finishing installation, load IonStarStat into the R environment as follows:

```
#Load IonStarStat
library("IonStarStat")
```

### File location

To perform using IonStar, it is recommended to put all files under the same working directory, including:

- LC-MS raw files `.raw`
- Spectrum report `.csv`, `.tsv`, or `.txt`
- SIEVE database file `.sdb`
- Annotated frame list `.csv`
- Sample list `.csv`
- Protein & peptide quantitative results `.csv`



- `IonStar_FrameGen.R` and `IonStar_Run.R`

Use `setwd()` to locate the files whenever necessary.

## Quickstart

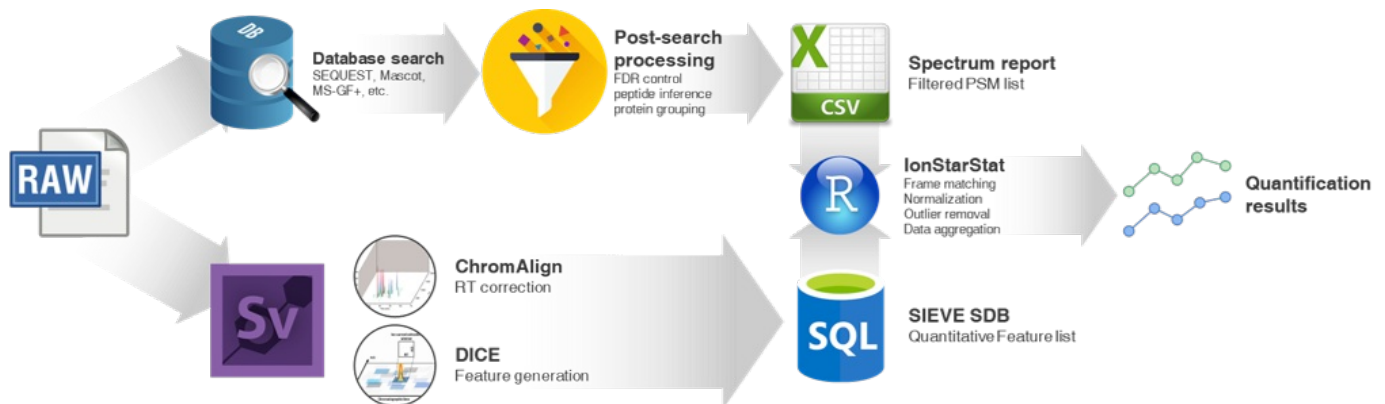

## Step 1: Protein identification

Protein identification can be performed by any database searching engines and post-search processing tools. The final output is a so-called spectrum report containing PSMs from all sample runs passing the confidence threshold (*e.g.* FDR). The spectrum report can be exported from a number of software packages, *e.g.* **Proteome Discoverer**, **Scaffold**. Key information necessary for data integration include **rawfile name** and **MS2 scan number**. The file format of the spectrum report needs to be `.csv`.

The currently protein identification workflow used by our group features database searching by **MS-GF+**, post-search processing by **IDPicker**, and spectrum report generation by **IonStarSPG.R**. Detailed instructions can be found [here](#).

## Step 2: Generation of quantitative features by SIEVE™

Quantitative feature generation in IonStar is accomplished by SIEVE™ v2.2 SP2 (Thermo Scientific), which integrates ChromAlign for global 3-D chromatographic alignment and a direct ion current extraction (DICE) method for feature extraction.

### 1. Load rawfiles into SIEVE™

To start the quantitative feature generation analysis, open SIEVE™ and select **File -> Create new experiment**. On the **Designate Experiment Type** page, select the Experiment Type based on the study. For a case-control experiment, use **Two Sample Differential Analysis**; for multi-condition experiment (3 or more conditions including control), use **Control Compare Trend**.



**SIEVE Experiment Definition Wizard**

**Designate Experiment Type**  
Specify the type of experiment.

Domain

☒ Proteomics

☐ Small Molecule

Signal Detection Algorithm

☒ Chromatographic Alignment and Framing

☐ Component Extraction

Experiment Type

☒ Two Sample Differential Analysis

☐ Control Compare Trend

☐ Differential Case Study with ROC Analysis

☐ Non-differential Single Class Analysis

Experiment Name:

Description (optional):

Next >>

Drag all rawfiles into the **Raw File Selection** page.

**SIEVE Experiment Definition Wizard**

**Raw File Selection**  
Select all of the raw files that will be part of this analysis.

Ready.

Scan Raw Files (Optional)

Open File Explorer

| File name                          | Path         | Size       | Full scans | MS2 scans | SW Version | Instrument | C |
|------------------------------------|--------------|------------|------------|-----------|------------|------------|---|
| B03_02_150304_human_ecoli_B_3ul... | D:\data\N... | 1493861886 | -          | -         | -          | -          | - |
| B03_03_150304_human_ecoli_C_3ul... | D:\data\N... | 1515178530 | -          | -         | -          | -          | - |
| B03_04_150304_human_ecoli_D_3ul... | D:\data\N... | 1501253698 | -          | -         | -          | -          | - |
| B03_05_150304_human_ecoli_E_3ul... | D:\data\N... | 1504549786 | -          | -         | -          | -          | - |
| B03_06_150304_human_ecoli_E_3ul... | D:\data\N... | 1494186370 | -          | -         | -          | -          | - |
| B03_07_150304_human_ecoli_D_3ul... | D:\data\N... | 1501876234 | -          | -         | -          | -          | - |
| B03_08_150304_human_ecoli_C_3ul... | D:\data\N... | 1508096986 | -          | -         | -          | -          | - |
| B03_09_150304_human_ecoli_B_3ul... | D:\data\N... | 1496988622 | -          | -         | -          | -          | - |
| B03_10_150304_human_ecoli_A_3ul... | D:\data\N... | 1497799722 | -          | -         | -          | -          | - |
| B03_11_150304_human_ecoli_A_3ul... | D:\data\N... | 1487585854 | -          | -         | -          | -          | - |
| B03_12_150304_human_ecoli_B_3ul... | D:\data\N... | 1472568282 | -          | -         | -          | -          | - |
| B03_13_150304_human_ecoli_C_3ul... | D:\data\N... | 1526287654 | -          | -         | -          | -          | - |
| B03_14_150304_human_ecoli_D_3ul... | D:\data\N... | 1478350694 | -          | -         | -          | -          | - |
| B03_15_150304_human_ecoli_E_3ul... | D:\data\N... | 1476537646 | -          | -         | -          | -          | - |
| B03_16_150304_human_ecoli_E_3ul... | D:\data\N... | 1471207126 | -          | -         | -          | -          | - |
| B03_17_150304_human_ecoli_D_3ul... | D:\data\N... | 1481006330 | -          | -         | -          | -          | - |
| B03_18_150304_human_ecoli_C_3ul... | D:\data\N... | 1478885942 | -          | -         | -          | -          | - |

<< Back

Next >>

## 2. Assign sample conditions and select reference file

For **Two Sample Differential Analysis**, assign *Condition A* and *Condition B* in the two boxes;  
For **Control Compare Trend**, put *all conditions* in the upper box and assign *the control condition*



in the lower box.

## Two Sample Differential Analysis:

**SIEVE Experiment Definition Wizard**

**Raw File Characterization**  
Characterize the files selected for this experiment

Raw File Designation

AvB

Differential ratios are calculated as Treatment / Control

Condition A (Treatment):   **Sample\_B01.RAW**

Condition B (Control):   **Control\_A02.RAW**

Selecting a condition that is part of a raw file name automatically tags it in the table below.

*\*Press TAB to move to the next field*

| Inc                                 | Raw File Name                                           | Condition | Color | Ref                                 |
|-------------------------------------|---------------------------------------------------------|-----------|-------|-------------------------------------|
| <input checked="" type="checkbox"/> | B03_02_150304_human_ecoli_B_3ul_3um_column_95_HCD_OT_2h | Control   | Blue  | <input type="checkbox"/>            |
| <input checked="" type="checkbox"/> | B03_03_150304_human_ecoli_C_3ul_3um_column_95_HCD_OT_2h | Control   | Blue  | <input type="checkbox"/>            |
| <input checked="" type="checkbox"/> | B03_04_150304_human_ecoli_D_3ul_3um_column_95_HCD_OT_2h | Control   | Blue  | <input type="checkbox"/>            |
| <input checked="" type="checkbox"/> | B03_05_150304_human_ecoli_E_3ul_3um_column_95_HCD_OT_2h | Control   | Blue  | <input type="checkbox"/>            |
| <input checked="" type="checkbox"/> | B03_06_150304_human_ecoli_E_3ul_3um_column_95_HCD_OT_2h | Control   | Blue  | <input type="checkbox"/>            |
| <input checked="" type="checkbox"/> | B03_07_150304_human_ecoli_D_3ul_3um_column_95_HCD_OT_2h | Control   | Blue  | <input type="checkbox"/>            |
| <input checked="" type="checkbox"/> | B03_08_150304_human_ecoli_C_3ul_3um_column_95_HCD_OT_2h | Control   | Blue  | <input type="checkbox"/>            |
| <input checked="" type="checkbox"/> | B03_09_150304_human_ecoli_B_3ul_3um_column_95_HCD_OT_2h | Control   | Blue  | <input type="checkbox"/>            |
| <input checked="" type="checkbox"/> | B03_10_150304_human_ecoli_A_3ul_3um_column_95_HCD_OT_2h | Control   | Blue  | <input type="checkbox"/>            |
| <input checked="" type="checkbox"/> | B03_11_150304_human_ecoli_A_3ul_3um_column_95_HCD_OT_2h | Control   | Blue  | <input checked="" type="checkbox"/> |

<< Back Next >>

## Control Compare Trend:

**SIEVE Experiment Definition Wizard**

**Raw File Characterization**  
Characterize the files selected for this experiment

Raw File Designation

Trend

Groups:  **Sample\_B01.RAW**  
**Control\_A02.RAW**

Ratio group:

Type group names separated by a space (a group name that is part of a raw file name automatically tags it). Then select the group used for ratio calculations.

*\*Press TAB to move to the next field*

| Inc                                 | Raw File Name                                           | Subject | Trend Point | Color   | Ref                                 |
|-------------------------------------|---------------------------------------------------------|---------|-------------|---------|-------------------------------------|
| <input checked="" type="checkbox"/> | B03_05_150304_human_ecoli_E_3ul_3um_column_95_HCD_OT_2h | NONE    | E           | Fuchsia | <input type="checkbox"/>            |
| <input checked="" type="checkbox"/> | B03_06_150304_human_ecoli_E_3ul_3um_column_95_HCD_OT_2h | NONE    | E           | Fuchsia | <input type="checkbox"/>            |
| <input checked="" type="checkbox"/> | B03_07_150304_human_ecoli_D_3ul_3um_column_95_HCD_OT_2h | NONE    | D           | Blue    | <input type="checkbox"/>            |
| <input checked="" type="checkbox"/> | B03_08_150304_human_ecoli_C_3ul_3um_column_95_HCD_OT_2h | NONE    | C           | Lime    | <input type="checkbox"/>            |
| <input checked="" type="checkbox"/> | B03_09_150304_human_ecoli_B_3ul_3um_column_95_HCD_OT_2h | NONE    | B           | Yellow  | <input type="checkbox"/>            |
| <input checked="" type="checkbox"/> | B03_10_150304_human_ecoli_A_3ul_3um_column_95_HCD_OT_2h | NONE    | A           | Red     | <input type="checkbox"/>            |
| <input checked="" type="checkbox"/> | B03_11_150304_human_ecoli_A_3ul_3um_column_95_HCD_OT_2h | NONE    | A           | Red     | <input type="checkbox"/>            |
| <input checked="" type="checkbox"/> | B03_12_150304_human_ecoli_B_3ul_3um_column_95_HCD_OT_2h | NONE    | B           | Yellow  | <input checked="" type="checkbox"/> |
| <input checked="" type="checkbox"/> | B03_13_150304_human_ecoli_C_3ul_3um_column_95_HCD_OT_2h | NONE    | C           | Lime    | <input type="checkbox"/>            |
| <input checked="" type="checkbox"/> | B03_14_150304_human_ecoli_D_3ul_3um_column_95_HCD_OT_2h | NONE    | D           | Blue    | <input type="checkbox"/>            |

<< Back Next >>

A reference file also needs to be selected. In general, the reference file should provide the highest



alignment scores for all sample runs. In most cases, it is recommended to start with a file in the middle of the LC-MS sequence as the reference.

### 3. Modify method parameters

The parameters that need to be modified include **Frame Time Width (min)** and **M/Z Width (ppm)**. The current setting is based on **a 3-hr nano RPLC gradient with a Thermo Orbitrap instrument under 120K MS1 resolution**. Manual optimization based on the LC-MS method may help to improve the performance of feature generation. All other parameters follow the default settings.

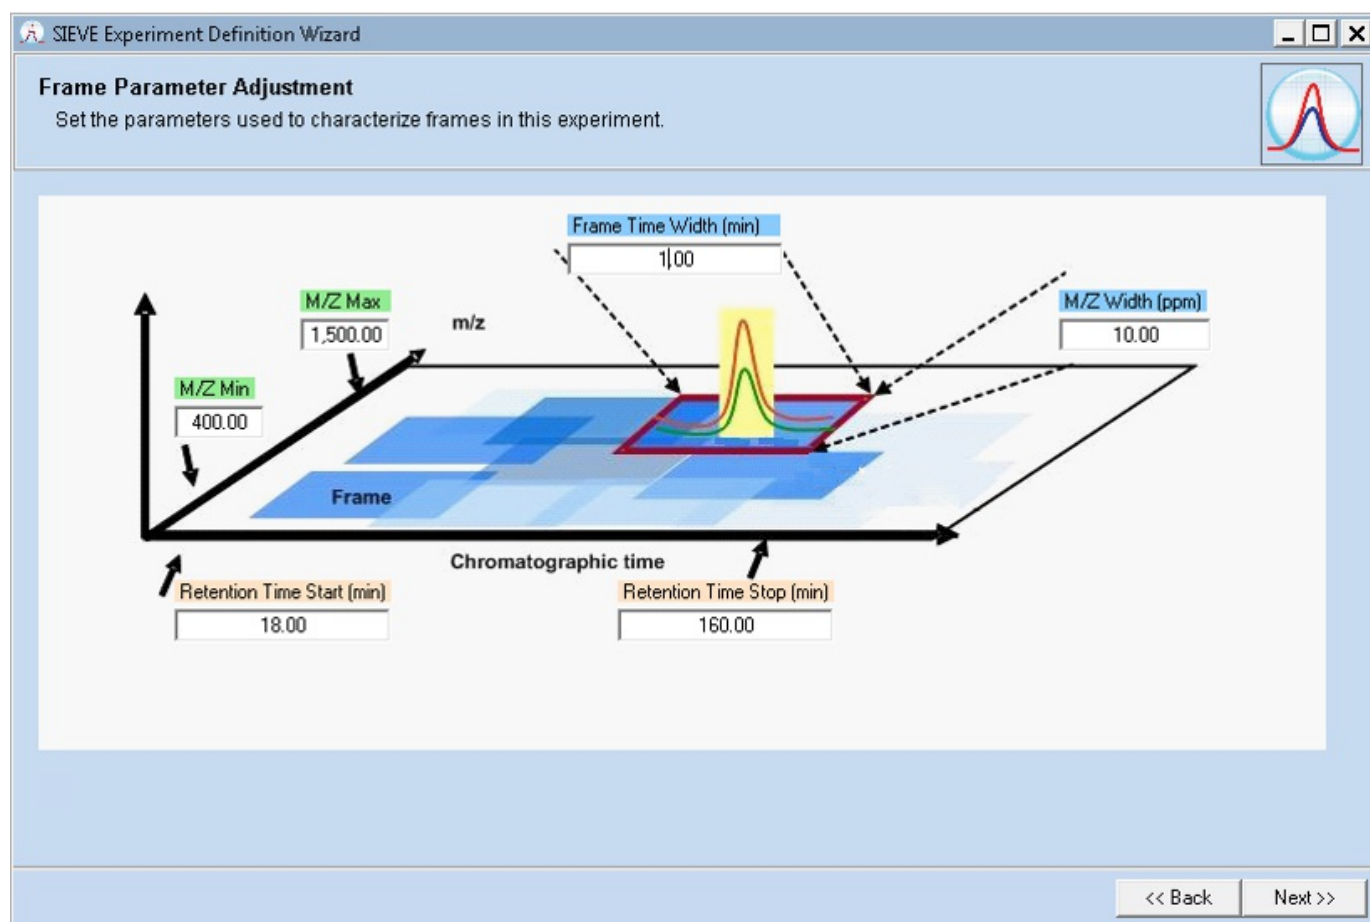

Check **Generate all frames based upon all MS2 scan's retention times and precursor M/Zs** to maximize the number of quantitative features. Alternatively, users can assign **Maximum Number of Frames** and **Peak Intensity Threshold**.



**SIEVE Experiment Definition Wizard**

**Frame Selection**  
Set the framing intensity threshold and targeted frames list.

**Raw File Analyzer**

Maximum Number of Frames:  
5,000

Peak Intensity Threshold:  
59,505,106

☒ Generate all frames based upon all MS2 scan's retention times and precursor M/Zs

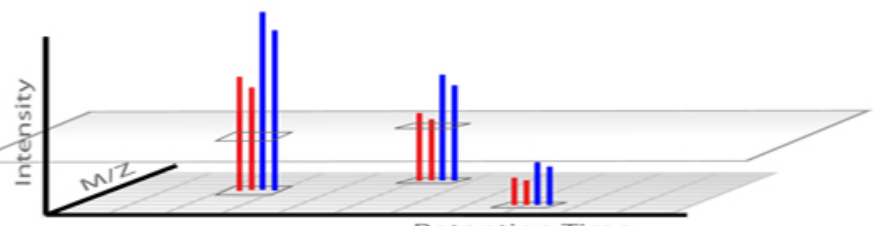

The number of frames generated will depend upon the peak intensity threshold or the maximum number of frames - whichever condition is met first.

**Targeted MZ/RT Frames List**

Frames can be created at specific MZ and Retention Time coordinates. Each MZ/RT coordinate listed will create frames at the beginning of the frames list beginning with Frame 1. This may be useful to force the creation of frames for internal standards or other landmarks.



Targeted Frames List (optional):

Frame Target Wizard

<< Back      Next >>

After setting the method, finish the wizard and save the .sdb file.

#### 4. Perform ChromAlign and DICE procedures

For IonStar, users do not need to run the **Identify** process. In the **SIEVE Parameters** window, **MaxThreads** should be changed according to the configuration of the computer used for SIEVE™. For example, 6~8 threads are recommended for a PC with 16-core processors and 192 GB RAM. Occasionally, **PCAProcess** can also be disabled to alleviate computational burden. Click the **Update** button to save the settings. Run **Align** (ChromAlign) first.



SIEVEx64: E:\Data\Kevin\IonStar\_PRIDE\IonStarPRIDE\_database.sdb

File Workspace Tools Help

Home Process Alignment Analyze

### Align

Press Run to start Alignment.

Run

### Frame

Run

### Identify

Run

### Workflow Starting Point

Align Frame Identify

Run As Workflow

### SIEVE Parameters

|                                |                                           |
|--------------------------------|-------------------------------------------|
| <b>0. Global Settings</b>      |                                           |
| Algorithm                      | FRAME                                     |
| Description                    |                                           |
| ExperimentTarget               | PROTEOMICS                                |
| ExperimentType                 | NORMALIZED_TREND                          |
| MaxThreads                     | 8                                         |
| MZStart                        | 400                                       |
| MZStop                         | 1500                                      |
| Name                           | IonStarPRIDE_database                     |
| PCAPProcess                    | DISABLE                                   |
| Rawfiles                       | (Collection)                              |
| ReferenceFile                  | 803_13_150304_human_ecoli_C_3ul_3um_coulr |
| RTStart                        | 18                                        |
| RTStop                         | 160                                       |
| ScanFilter                     | FTMS + p NSI Full ms [400.0000-1500.001   |
| <b>1. Alignment Parameters</b> |                                           |
| AlignmentBypass                | False                                     |
| AlignmentMinIntensity          | 1000                                      |
| CorrelationBinWidth            | 1                                         |
| MaxRTShift                     | 0.2                                       |
| TileSize                       | 300                                       |
| <b>2. Frame Parameters</b>     |                                           |
| Conditions                     | :                                         |
| ControlGroup                   | A                                         |
| FrameSeedFile                  |                                           |

**Rawfiles**  
A collection of raw files in this experiment. Expand this option to see details for each raw file.

Export Update

### Computer Resource Monitor

CPU Load (%): 0%

Disk Load (%): 0%

CPU cores (virtual real): 28 Available Memory(MB): 138767

Upon finishing, alignment scores for all sample runs will be shown in the **Alignment** tab. Ideally, the majority of sample runs should have an alignment score of **>0.8** to ensure the quality of quantitative feature generation. Change the reference file and rerun the ChromAlign process if the alignment scores are subpar (*e.g.* <0.7) for a large portion of the files.



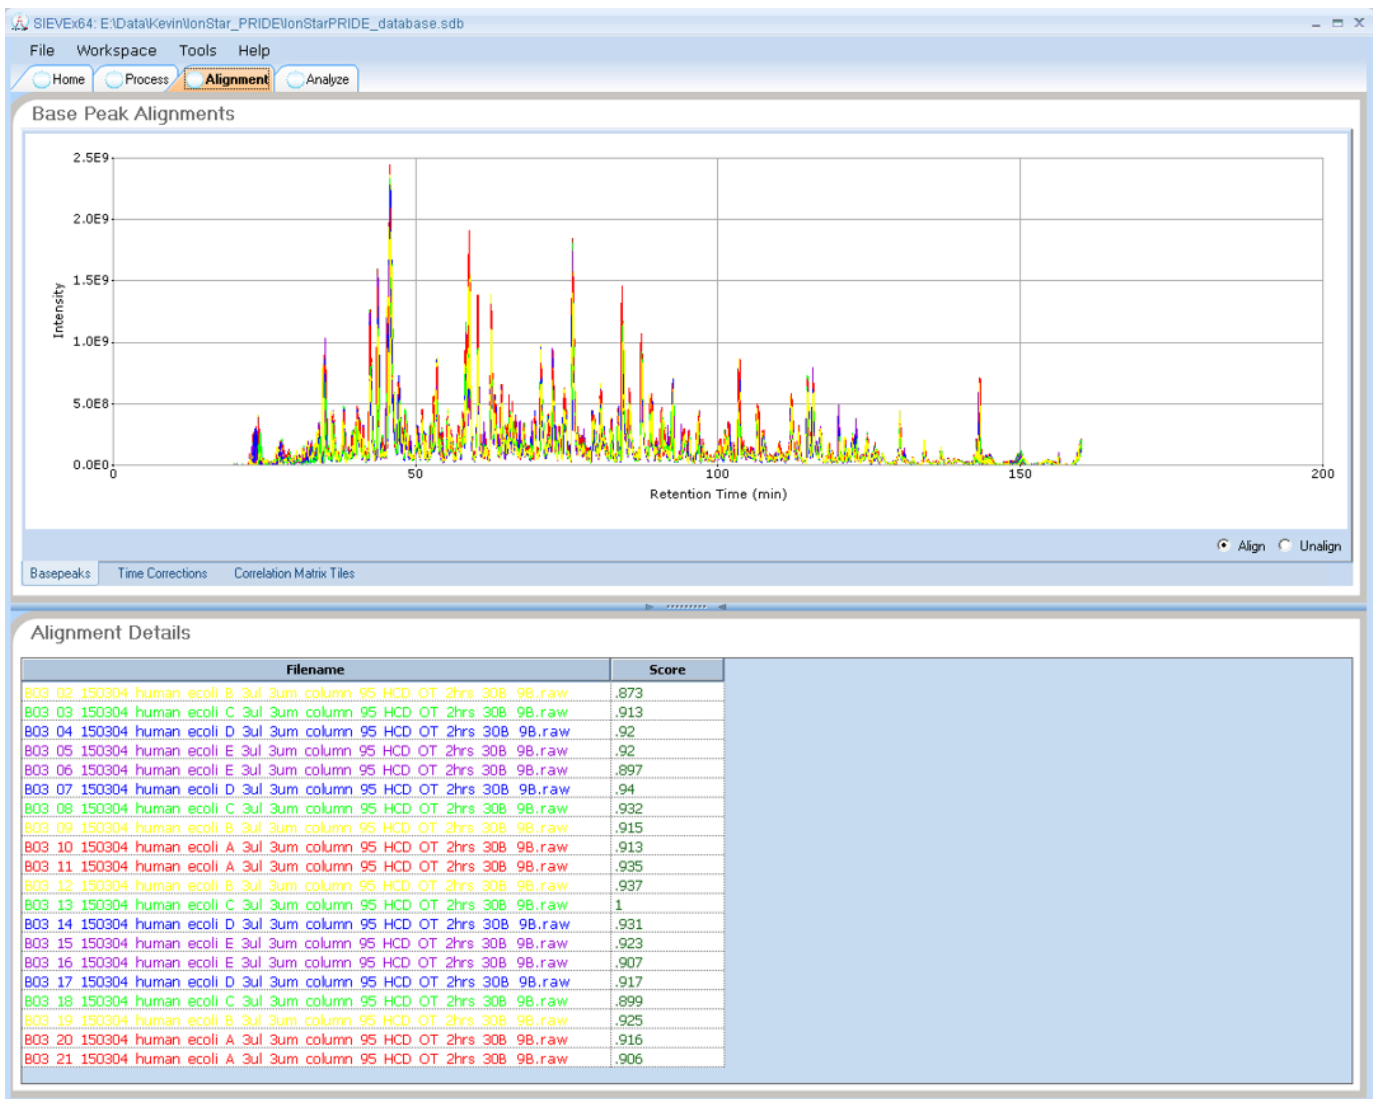

To change the reference file, click the “...” button in the **Rawfiles** line. Change the reference file by checking a new rawfile. Rerun **Align** and check the alignment scores again. When finished, run **Frame** to perform the DICE process.

RawFileEditorForm

### Raw File Editor

| INC                                 | REF                                 | NAME                                            | COLOR      | TRENDPOINT |          |
|-------------------------------------|-------------------------------------|-------------------------------------------------|------------|------------|----------|
| <input checked="" type="checkbox"/> | <input type="checkbox"/>            | B03_02_150304_human_ecoli_B_3ul_3um_column_95_H | Yellow     | @ B        | E:\Data\ |
| <input checked="" type="checkbox"/> | <input type="checkbox"/>            | B03_03_150304_human_ecoli_C_3ul_3um_column_95_H | Lime       | @ C        | E:\Data\ |
| <input checked="" type="checkbox"/> | <input type="checkbox"/>            | B03_04_150304_human_ecoli_D_3ul_3um_column_95_H | Blue       | @ D        | E:\Data\ |
| <input checked="" type="checkbox"/> | <input type="checkbox"/>            | B03_05_150304_human_ecoli_E_3ul_3um_column_95_H | DarkViolet | @ E        | E:\Data\ |
| <input checked="" type="checkbox"/> | <input type="checkbox"/>            | B03_06_150304_human_ecoli_E_3ul_3um_column_95_H | DarkViolet | @ E        | E:\Data\ |
| <input checked="" type="checkbox"/> | <input type="checkbox"/>            | B03_07_150304_human_ecoli_D_3ul_3um_column_95_H | Blue       | @ D        | E:\Data\ |
| <input checked="" type="checkbox"/> | <input type="checkbox"/>            | B03_08_150304_human_ecoli_C_3ul_3um_column_95_H | Lime       | @ C        | E:\Data\ |
| <input checked="" type="checkbox"/> | <input type="checkbox"/>            | B03_09_150304_human_ecoli_B_3ul_3um_column_95_H | Yellow     | @ B        | E:\Data\ |
| <input checked="" type="checkbox"/> | <input type="checkbox"/>            | B03_10_150304_human_ecoli_A_3ul_3um_column_95_H | Red        | @ A        | E:\Data\ |
| <input checked="" type="checkbox"/> | <input type="checkbox"/>            | B03_11_150304_human_ecoli_A_3ul_3um_column_95_H | Red        | @ A        | E:\Data\ |
| <input checked="" type="checkbox"/> | <input type="checkbox"/>            | B03_12_150304_human_ecoli_B_3ul_3um_column_95_H | Yellow     | @ B        | E:\Data\ |
| <input checked="" type="checkbox"/> | <input checked="" type="checkbox"/> | B03_13_150304_human_ecoli_C_3ul_3um_column_95_H | Lime       | @ C        | E:\Data\ |
| <input checked="" type="checkbox"/> | <input type="checkbox"/>            | B03_14_150304_human_ecoli_D_3ul_3um_column_95_H | Blue       | @ D        | E:\Data\ |
| <input checked="" type="checkbox"/> | <input type="checkbox"/>            | B03_15_150304_human_ecoli_E_3ul_3um_column_95_H | DarkViolet | @ E        | E:\Data\ |
| <input checked="" type="checkbox"/> | <input type="checkbox"/>            | B03_16_150304_human_ecoli_E_3ul_3um_column_95_H | DarkViolet | @ E        | E:\Data\ |
| <input checked="" type="checkbox"/> | <input type="checkbox"/>            | B03_17_150304_human_ecoli_D_3ul_3um_column_95_H | Blue       | @ D        | E:\Data\ |
| <input checked="" type="checkbox"/> | <input type="checkbox"/>            | B03_18_150304_human_ecoli_C_3ul_3um_column_95_H | Lime       | @ C        | E:\Data\ |

Remove Row Add Row Close



After feature generation, the `.sdb` file will contain all quantitative features ( *i.e.* frames) generated. For more detailed information about the use of SIEVE, please refer to [SIEVE User Guide](#).

## Step 3: Data integration and quantification

After protein identification and quantitative feature generation, the R package **IonStarStat** will be utilized to integrate the spectrum report with the quantitative feature list and generate the final quantitative results. Procedures in this step include:

- Generation of the annotated frame list
- Removal of redundant quantitative features
- Frame-to-peptide aggregation & data normalization
- Multivariate mean variation-based outlier detection
- Shared peptide removal (optional)
- Peptide-to-protein aggregation

The codes for this step are enclosed in [IonStar\\_Run.R](#).

### 1. Generate the annotated frame list

In the spectrum report, the **rawfile name** column ( `sp_col[1]` ) should only contain the file name with no extension (*e.g.*

II\_Bo3\_21\_150304\_human\_ecoli\_A\_3ul\_3um\_column\_95\_HCD\_OT\_2hrs\_30B\_9B), and the **MS2 scan number** should be numeric ( *e.g.* 58143).

Use the following codes to generate **the annotated frame list** and **the sample list**, which are both required for subsequent protein quantification. Make sure that the following packages are installed by running `install.packages(c("XLConnect", "RSQLite"))`.

```
##Generate the annotated frame list
db <- "IonStarPRIDE_database.sdb" ##File name of the SIEVE database
sp <- "IonStarPRIDE_spectrum_report.csv" ##File name of the spectrum report
col_filename <- 4 ##Column number for rawfile name
col_scannum <- 17 ##Column number for MS2 scan number
col_framelist <- c(6,18) ##Column numbers for Protein accession number and Peptide sequence
framelist <- "IonStarPRIDE_frame.csv" ##File name of the annotated frame list (output1)
sampleid <- "IonStarPRIDE_sampleid.csv" ##File name of the sample list (output 2)
source ("IonStar_FrameGen.R")
```

The annotated frame list `.csv` generated consists of **Protein accession number**, **Peptide sequence**, **Frame ID**, and **corresponding quantitative values in each sample**, shown as below.



```
##          ProteinAC          PepSeq FrameID          A1          B1
## 1 Q96I51:WBS16_HUMAN EAAEAEAEVPVVQYVGER 35199 5452494 475886.4
## 2 P0C8J6:GATY_ECOLI INVATELK 11407 216541745 262224407.0
## 3 P0C8J6:GATY_ECOLI NYLTEHPEATDPR 6302 50365797 52927424.6
## 4 P0C8J6:GATY_ECOLI QWVNLPLVLHGASGLSTK 47084 13635817 18975922.8
## 5 P0C8J6:GATY_ECOLI QWVNLPLVLHGASGLSTK 85743 158317760 128711136.1
## 6 P0C8J6:GATY_ECOLI SVMIDASHLPFAQNISR 41490 47259460 47781835.2
##          C1          D1          E1          E2          D2          C2          B2
## 1 1391912 2289193 1302592 1146268 1645735 1091675 2789563
## 2 342242173 411246895 481214021 451974788 394233403 304898893 251107764
## 3 60233419 74382575 92162468 94188976 75480174 50618895 41996791
## 4 21041386 31074728 39476379 37953565 28216572 22198631 13746699
## 5 113131881 116859175 113338204 107014155 112368481 114584694 118152103
## 6 55798367 69234723 83597655 86098121 61897136 53934485 40421413
##          A2          A3          B3          C3          D3          E3          E4
## 1 660561.7 1583813 5148398 1923703 3842454 4221733 3554227
## 2 175357014.9 207088734 254629839 330040590 391575868 494867018 491473921
## 3 28891661.5 52817845 76774606 62542501 131993194 166741064 171442525
## 4 8390298.0 12464382 29358146 21184939 50791891 66393810 63215742
## 5 121447044.0 155394791 156556630 115749102 144621808 136891875 141464442
## 6 28736591.6 48176223 69299555 52708139 116873607 142661980 134440236
##          D4          C4          B4          A4
## 1 3582159 4278508 5723243 3780455
## 2 495393627 389784097 318133056 216134657
## 3 144341093 110284315 81203507 59372919
## 4 48868329 35728182 22188573 13603490
## 5 140116613 143775988 150280000 149897829
## 6 110236215 85939761 63125621 46183524
```

## 2. Perform protein quantification

Before running the R codes, modify **the sample list** so that each sample is assigned a **GroupID**. **GroupID** can be any combinations of alphabetic and numeric symbols, *e.g. A, Group1, 088714*.



```
##                                     RawFiles
## 1  II_B03_21_150304_human_ecoli_A_3ul_3um_column_95_HCD_OT_2hrs_30B_9B
## 2  II_B03_02_150304_human_ecoli_B_3ul_3um_column_95_HCD_OT_2hrs_30B_9B
## 3  II_B03_03_150304_human_ecoli_C_3ul_3um_column_95_HCD_OT_2hrs_30B_9B
## 4  II_B03_04_150304_human_ecoli_D_3ul_3um_column_95_HCD_OT_2hrs_30B_9B
## 5  II_B03_05_150304_human_ecoli_E_3ul_3um_column_95_HCD_OT_2hrs_30B_9B
## 6  II_B03_06_150304_human_ecoli_E_3ul_3um_column_95_HCD_OT_2hrs_30B_9B
## 7  II_B03_07_150304_human_ecoli_D_3ul_3um_column_95_HCD_OT_2hrs_30B_9B
## 8  II_B03_08_150304_human_ecoli_C_3ul_3um_column_95_HCD_OT_2hrs_30B_9B
## 9  II_B03_09_150304_human_ecoli_B_3ul_3um_column_95_HCD_OT_2hrs_30B_9B
## 10 II_B03_10_150304_human_ecoli_A_3ul_3um_column_95_HCD_OT_2hrs_30B_9B
## 11 II_B03_11_150304_human_ecoli_A_3ul_3um_column_95_HCD_OT_2hrs_30B_9B
## 12 II_B03_12_150304_human_ecoli_B_3ul_3um_column_95_HCD_OT_2hrs_30B_9B
## 13 II_B03_13_150304_human_ecoli_C_3ul_3um_column_95_HCD_OT_2hrs_30B_9B
## 14 II_B03_14_150304_human_ecoli_D_3ul_3um_column_95_HCD_OT_2hrs_30B_9B
## 15 II_B03_15_150304_human_ecoli_E_3ul_3um_column_95_HCD_OT_2hrs_30B_9B
## 16 II_B03_16_150304_human_ecoli_E_3ul_3um_column_95_HCD_OT_2hrs_30B_9B
## 17 II_B03_17_150304_human_ecoli_D_3ul_3um_column_95_HCD_OT_2hrs_30B_9B
## 18 II_B03_18_150304_human_ecoli_C_3ul_3um_column_95_HCD_OT_2hrs_30B_9B
## 19 II_B03_19_150304_human_ecoli_B_3ul_3um_column_95_HCD_OT_2hrs_30B_9B
## 20 II_B03_20_150304_human_ecoli_A_3ul_3um_column_95_HCD_OT_2hrs_30B_9B
##      GroupID
## 1          A
## 2          B
## 3          C
## 4          D
## 5          E
## 6          E
## 7          D
## 8          C
## 9          B
## 10         A
## 11         A
## 12         B
## 13         C
## 14         D
## 15         E
## 16         E
## 17         D
## 18         C
## 19         B
## 20         A
```

Make sure to load `IonStarStat` by `library("IonStarstat")` . Read the annotated frame list and the grouped sample list into R environment.



```
rawfile <- "IonStarPRIDE_Frame.csv"
condfile <- "IonStarPRIDE_Groups.csv"
raw <- read.csv(rawfile)
cond <- read.csv(condfile)
condition <- cond[match(colnames(raw)[-c(1:3)], cond[,1]),2]
condition
```

```
## [1] A B C D E E D C B A A B C D E E D C B A
## Levels: A B C D E
```

Use `newProDataSet` to remove redundant frames (*i.e.* frames assigned to multiple peptide sequences), which causes ambiguity in quantification.

```
pdata <- newProDataSet(proData=raw, condition=condition)
```

The number of proteins before and after removal, as well as the number of redundant frames removed will be reported in the console.

```
## Input 3886 proteins.
```

```
## 6489 duplicated frames founded.
```

```
## 3873 proteins left after filtering.
```

Use `pnormalize` to perform inter-sample normalization of quantitative intensities. Aggregation of frame data to peptide data can be done by `summarize=TRUE`. Normalization can be based on either total ion intensities (`method="TIC"`) or quantiles (`method="quantiles"`) in each sample. Use `method=NULL` to skip normalization.

```
ndata <- pnormalize(pdata, summarize=TRUE, method="TIC")
```

Boxplots of peptide quantitative data before (left) and after (normalization) are shown as follows.



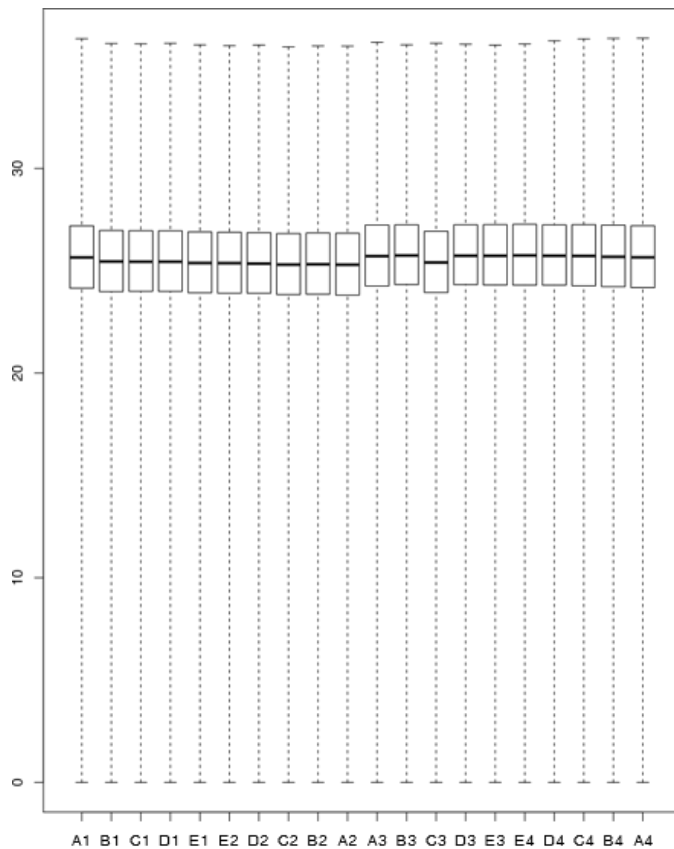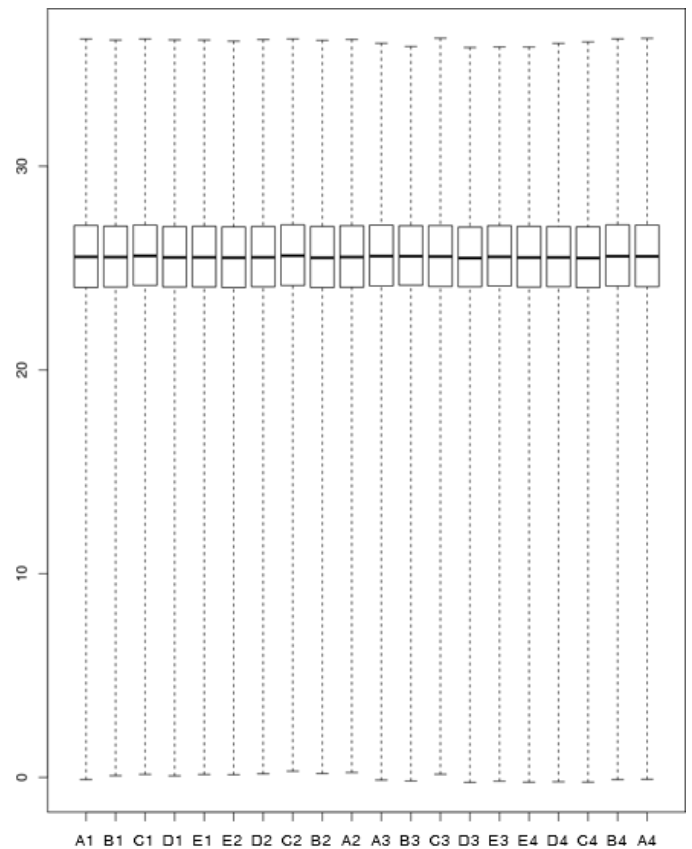

Use `OutlierPeptideRM` to perform outlier peptide detection. IonStar uses **Principal Component-based Outlier Detection (PCOut)** for outlier detection, which is tailored for multi-condition comparison (at least 3 conditions including control).

Parameter `variance` (0.7~0.9) can be adjusted according to the stringency needed for outlier detection. The higher the value the more outliers will be rejected.

```
cdata<-OutlierPeptideRM(ndata,condition,variance=0.7,critM1=1/3,critM2=1/4,ra
tio=TRUE)
```

```
## 6049 outliers were removed; 21937 peptides left after outlier removal.
```

For **case-control comparison**, set parameter `ratio=FALSE`. Alternatively, **Grubb's test** can be used for outlier rejection, which will be available in the next build of IonStarStat.

Use `SharedPeptideRM` to remove shared peptides (*i.e.* peptides inferred to multiple unique protein groups, *a.k.a.* degenerate peptides). This step is optional as many highly abundance proteins share a large proportion of homologous sequence domains. Removal of these peptides could be counterproductive for quantification. However, in specific cases, such as quantification of mixed-species samples, removal of shared peptides with species ambiguity is necessary to obtain species-specific quantitative results.

```
#Optional removal of shared peptides
cdata<-SharedPeptideRM(cdata)
```

Use `ProteinQuan` to aggregate peptide-level quantitative data to protein level. Both sum intensities (`method="sum"`) and General Linear Mixed Model (`method="fit"`) can be used for peptide-to-protein aggregation.



```
quan <- ProteinQuan(eset=cdata, method="sum")
```

| ##                    | PepNum   | A1       | B1       | C1       | D1       | E1       |
|-----------------------|----------|----------|----------|----------|----------|----------|
| ## A0AVT1:UBA6_HUMAN  | 4        | 26.62118 | 26.70643 | 26.70311 | 26.55632 | 26.56956 |
| ## A0FGR8:ESYT2_HUMAN | 12       | 29.14639 | 29.14287 | 29.19418 | 29.11159 | 29.07409 |
| ## A0MZ66:SHOT1_HUMAN | 8        | 27.38884 | 27.12556 | 27.21083 | 27.11330 | 27.08704 |
| ## A1LOT0:ILVBL_HUMAN | 4        | 24.82774 | 25.34471 | 25.23324 | 25.22633 | 25.29648 |
| ## A1X283:SPD2B_HUMAN | 4        | 25.91957 | 25.89851 | 25.98069 | 25.75741 | 25.62000 |
| ## A2RRP1:NBAS_HUMAN  | 2        | 23.21671 | 23.42673 | 23.27803 | 23.06164 | 22.72570 |
| ##                    | E2       | D2       | C2       | B2       | A2       | A3       |
| ## A0AVT1:UBA6_HUMAN  | 26.50505 | 26.59699 | 26.71673 | 26.65676 | 26.77142 | 26.80597 |
| ## A0FGR8:ESYT2_HUMAN | 29.04383 | 29.11444 | 29.18659 | 29.18904 | 29.28187 | 29.19237 |
| ## A0MZ66:SHOT1_HUMAN | 26.95478 | 27.11314 | 27.28457 | 27.07045 | 27.16919 | 27.32022 |
| ## A1LOT0:ILVBL_HUMAN | 25.25879 | 25.39263 | 25.29545 | 25.22623 | 25.41492 | 25.25910 |
| ## A1X283:SPD2B_HUMAN | 25.52778 | 25.70657 | 25.94787 | 25.87455 | 25.82754 | 26.14511 |
| ## A2RRP1:NBAS_HUMAN  | 22.98854 | 22.89805 | 23.27723 | 23.18188 | 23.39038 | 23.13157 |
| ##                    | B3       | C3       | D3       | E3       | E4       | D4       |
| ## A0AVT1:UBA6_HUMAN  | 26.63028 | 26.64539 | 26.37873 | 26.50122 | 26.37168 | 26.58727 |
| ## A0FGR8:ESYT2_HUMAN | 29.11881 | 29.20611 | 28.87648 | 28.95956 | 28.84509 | 28.92555 |
| ## A0MZ66:SHOT1_HUMAN | 27.35312 | 27.22668 | 27.28598 | 27.35093 | 27.21666 | 27.19223 |
| ## A1LOT0:ILVBL_HUMAN | 24.90396 | 25.21406 | 24.71122 | 24.80994 | 24.84718 | 24.86370 |
| ## A1X283:SPD2B_HUMAN | 25.99702 | 25.71892 | 25.62937 | 25.82062 | 25.72596 | 25.88044 |
| ## A2RRP1:NBAS_HUMAN  | 23.36878 | 23.10810 | 23.13342 | 22.86591 | 22.97998 | 23.19907 |
| ##                    | C4       | B4       | A4       |          |          |          |
| ## A0AVT1:UBA6_HUMAN  | 26.50536 | 26.60836 | 26.72253 |          |          |          |
| ## A0FGR8:ESYT2_HUMAN | 28.92343 | 29.11381 | 29.17440 |          |          |          |
| ## A0MZ66:SHOT1_HUMAN | 27.25682 | 27.33590 | 27.39389 |          |          |          |
| ## A1LOT0:ILVBL_HUMAN | 24.78118 | 24.96034 | 25.14340 |          |          |          |
| ## A1X283:SPD2B_HUMAN | 25.80138 | 25.88904 | 26.01037 |          |          |          |
| ## A2RRP1:NBAS_HUMAN  | 22.89899 | 23.26405 | 23.07043 |          |          |          |

Users can export both peptide and protein quantitative results by `write.csv`.

```
write.csv(quan, "IonStarPRIDE_protein_quan.csv")
write.csv(exprs(cdata), "IonStarPRIDE_peptide_quan.csv")
```

## Step 4: Post-quantification data processing

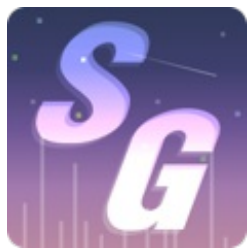

StarGazer, a Shiny-based interactive web app, will be made available in the next build of IonStar for post-quantification data processing. Fundamental functions of StarGazer include:

- Data cleanup and formatting
- Case-control protein ratio calculation



- Statistical testing
  - Basic data mining (*e.g.* PCA, hierarchical clustering, fuzzy c-means clustering)
  - Graphic depiction of quantitative data
- 

## Contact information

For questions, suggestions, and other topics about IonStarStat, feel free to contact us:

Shichen Shen: [shichens@buffalo.edu](mailto:shichens@buffalo.edu)

Xue Wang: [xwang79@buffalo.edu](mailto:xwang79@buffalo.edu)

Jun Qu: [junqu@buffalo.edu](mailto:junqu@buffalo.edu)



## REREFERENCES

1. Smith, R. D.; Anderson, G. A.; Lipton, M. S.; Pasa-Tolic, L.; Shen, Y.; Conrads, T. P.; Veenstra, T. D.; Udseth, H. R., An accurate mass tag strategy for quantitative and high-throughput proteome measurements. *Proteomics* **2002**, 2, 513-23.
2. Filzmoser, P.; Maronna, R.; Werner, M., Outlier identification in high dimensions. *Computational Statistics & Data Analysis* **2008**, 52, 1694-1711.
3. Shen, X.; Shen, S.; Li, J.; Hu, Q.; Nie, L.; Tu, C.; Wang, X.; Orsburn, B.; Wang, J.; Qu, J., An IonStar Experimental Strategy for MS1 Ion Current-Based Quantification Using Ultrahigh-Field Orbitrap: Reproducible, In-Depth, and Accurate Protein Measurement in Large Cohorts. *Journal of Proteome Research* **2017**, 16, 2445-2456.
4. Kramer, A.; Green, J.; Pollard, J., Jr.; Tugendreich, S., Causal analysis approaches in Ingenuity Pathway Analysis. *Bioinformatics* **2014**, 30, 523-30.
